# Supplementary material for: Smoking Intention and Progression From E-Cigarette Use to Cigarette Smoking
Source: Oxford University Press journal article supplement (doi:10.1542/peds.2020-002881), 2020-11-09
Supplement: peds_2020002881supplementarydata.pdf [file peds_2020002881supplementarydata.pdf]

## Supplemental Information

**SUPPLEMENTAL TABLE 5** Adjusted Multivariable Logistic Regression Showing Interaction Between Smoking Intention and Ever Using E-Cigarettes at Wave 2 in Prediction of Ever Cigarette Smoking, *N* = 8661

|                                                                     | Model 1      |          |      |           | Model 2      |          |      |           |
|---------------------------------------------------------------------|--------------|----------|------|-----------|--------------|----------|------|-----------|
|                                                                     | B (SE)       | <i>P</i> | aOR  | 95% CI    | B (SE)       | <i>P</i> | aOR  | 95% CI    |
| Intention to smoke (reference: no intention)                        | 0.76 (0.21)  | <.001    | 2.14 | 1.42–3.21 | 1.11 (0.22)  | <.001    | 3.03 | 1.97–4.68 |
| Ever using e-cigarettes (reference: never use)                      | 0.95 (0.20)  | <.001    | 2.58 | 1.73–3.85 | 1.53 (0.24)  | <.001    | 4.62 | 2.87–7.42 |
| Smoking intention x e-cigarette use                                 | —            | —        | —    | —         | −1.08 (0.32) | .001     | 0.34 | 0.18–0.64 |
| Parents more disapproving of smoking (reference: less disapproving) | −0.30 (0.61) | .63      | 0.74 | 0.22–0.25 | −0.26 (0.61) | .67      | 0.77 | 0.23–2.57 |
| PBC over smoking                                                    | −0.90 (0.18) | <.001    | 0.41 | 0.29–0.58 | −0.88 (0.17) | <.001    | 0.42 | 0.30–0.58 |
| Other tobacco product use at wave 2                                 | 0.64 (0.23)  | .006     | 1.90 | 1.21–2.98 | 0.63 (0.22)  | .005     | 1.89 | 1.22–2.91 |
| Protobacco advertisement exposure (0–10)                            | 0.05 (0.03)  | .11      | 1.05 | 0.99–1.11 | 0.05 (0.03)  | .11      | 1.05 | 0.99–1.11 |
| Antitobacco advertisement exposure (0–6)                            | 0.03 (0.04)  | .49      | 1.03 | 0.95–1.11 | 0.03 (0.04)  | .48      | 1.03 | 0.95–1.11 |
| Peer smoking (1–5)                                                  | 0.36 (0.10)  | <.001    | 1.43 | 1.18–1.74 | 0.35 (0.10)  | <.001    | 1.42 | 1.18–1.72 |
| Perceived harm of conventional cigarette smoking (1–4)              | −0.24 (0.19) | .21      | 0.79 | 0.54–1.14 | −0.23 (0.19) | .22      | 0.79 | 0.55–1.15 |
| Perceived addictiveness of cigarette smoking (1–5)                  | 0.07 (0.08)  | .35      | 1.08 | 0.91–1.26 | 0.07 (0.08)  | .38      | 1.07 | 0.92–1.25 |
| Access to cigarettes in store (participants' report) (1–4)          | −0.01 (0.10) | .91      | 0.99 | 0.82–1.20 | −0.01 (0.10) | .88      | 0.99 | 0.82–1.19 |
| Parental monitoring (0–2)                                           | 0.09 (0.13)  | .50      | 1.09 | 0.84–1.42 | 0.10 (0.13)  | .46      | 1.10 | 0.85–1.43 |
| Male sex (reference: female sex)                                    | 0.01 (0.16)  | .95      | 1.01 | 0.74–1.38 | 0.02 (0.16)  | .92      | 1.02 | 0.74–1.39 |
| 12–14 y old (reference: 15–17 y old)                                | −0.11 (0.15) | .47      | 0.90 | 0.67–1.21 | −0.07 (0.15) | .64      | 0.93 | 0.70–1.25 |
| Race and/or ethnicity (reference: white non-Hispanic)               |              |          |      |           |              |          |      |           |
| Black non-Hispanic                                                  | −1.07 (0.29) | <.001    | 0.34 | 0.19–0.61 | −1.09 (0.29) | <.001    | 0.34 | 0.19–0.60 |
| Other non-Hispanic                                                  | −0.30 (0.27) | .27      | 0.74 | 0.44–1.26 | −0.28 (0.26) | .28      | 0.75 | 0.45–1.27 |
| Hispanic                                                            | −0.87 (0.19) | <.001    | 0.42 | 0.29–0.61 | −0.87 (0.19) | <.001    | 0.42 | 0.29–0.61 |
| Parent's education (reference: high school graduate)                |              |          |      |           |              |          |      |           |
| Less than high school                                               | −0.19 (0.25) | .46      | 0.83 | 0.51–1.37 | −0.13 (0.25) | .60      | 0.88 | 0.53–1.44 |
| GED                                                                 | −0.26 (0.37) | .49      | 0.77 | 0.37–1.62 | −0.24 (0.37) | .52      | 0.79 | 0.38–1.64 |
| Some college                                                        | −0.31 (0.17) | .07      | 0.74 | 0.53–1.03 | −0.28 (0.18) | .12      | 0.76 | 0.53–1.07 |
| Bachelor's degree                                                   | −0.55 (0.28) | .05      | 0.58 | 0.33–1.00 | −0.50 (0.28) | .08      | 0.60 | 0.35–1.06 |
| Advanced degree                                                     | −0.65 (0.30) | .03      | 0.52 | 0.29–0.94 | −0.59 (0.29) | .04      | 0.55 | 0.31–0.98 |

—, not applicable.
